# Supplementary material for: Cross-linkable star-hyperbranched unimolecular micelles for the enhancement of the anticancer activity of clotrimazole
Source: Royal Society of Chemistry journal article supplement (doi:10.1039/d2tb02629e), 2023-01-01
Supplement: d2tb02629e2.pdf [file d2tb02629e2.pdf]

## Cross-linkable star-hyperbranched unimolecular micelles for the enhancement of the anticancer activity of clotrimazole

Mateusz Gosecki, Piotr Ziemczonek, Monika Gosecka\*, Malgorzata Urbaniak, Ewelina Wielgus, Monika Marcinkowska, Anna Janaszewska\*, Barbara Klajnert-Maculewicz

*Centre of Molecular and Macromolecular Studies, Polish Academy of Sciences*

*Sienkiewicza 112, 90-363 Lodz, Poland*

*\* Correspondence: mdybko@cbmm.lodz.pl*

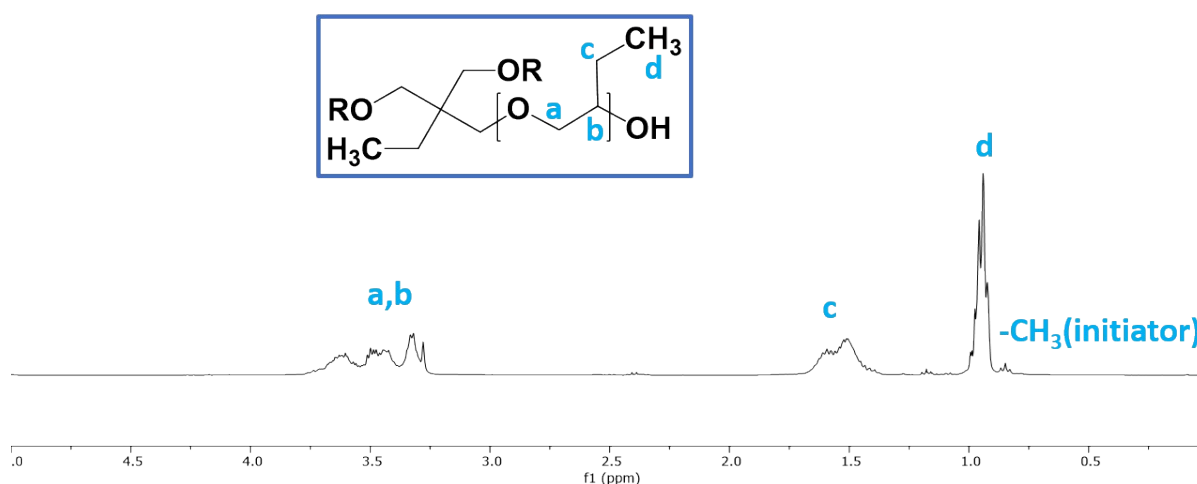

**S Figure 1.** <sup>1</sup>H NMR spectrum of poly(1,2-epoxybutane(3x10)) recorded in CDCl<sub>3</sub>.

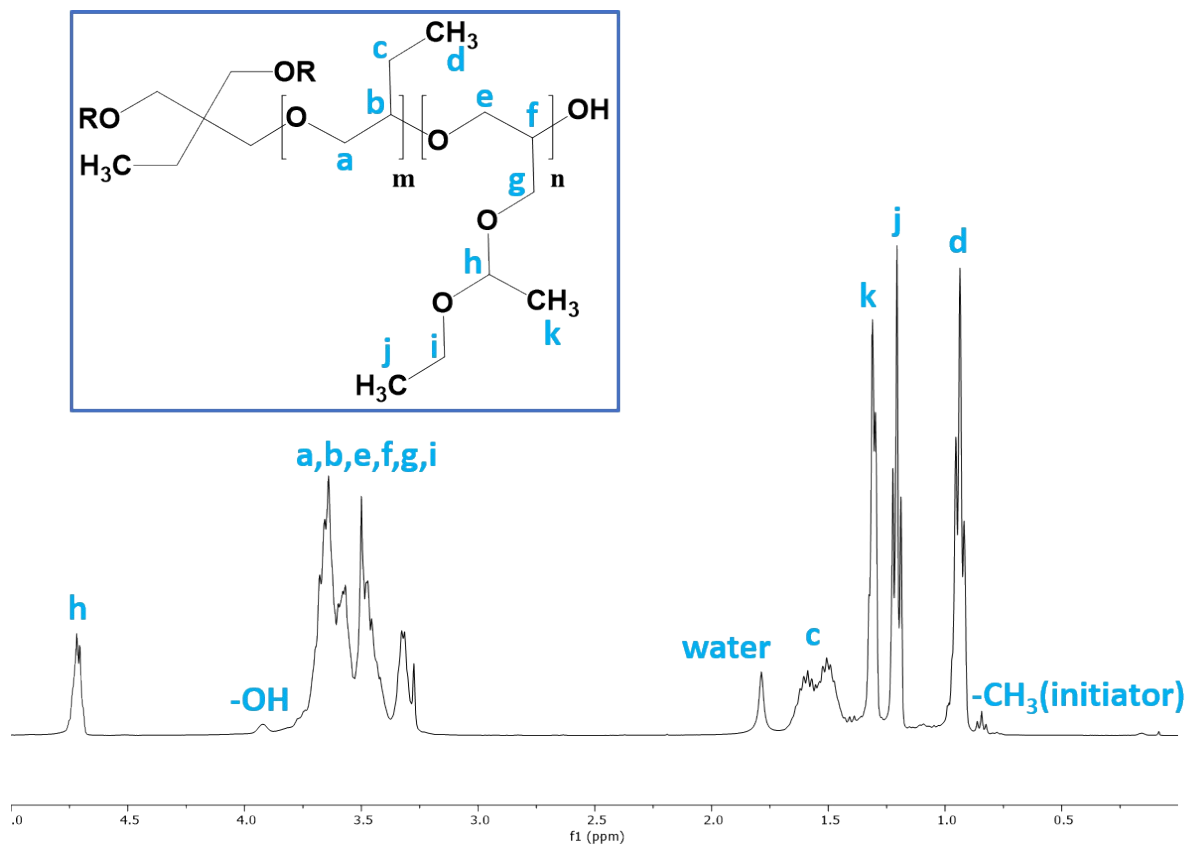

**S Figure 2.** <sup>1</sup>H NMR spectrum of poly(1,2-epoxybutane (3x10)-b-ethoxyethyl glycidyl ether (3x4)) recorded in CDCl<sub>3</sub>.

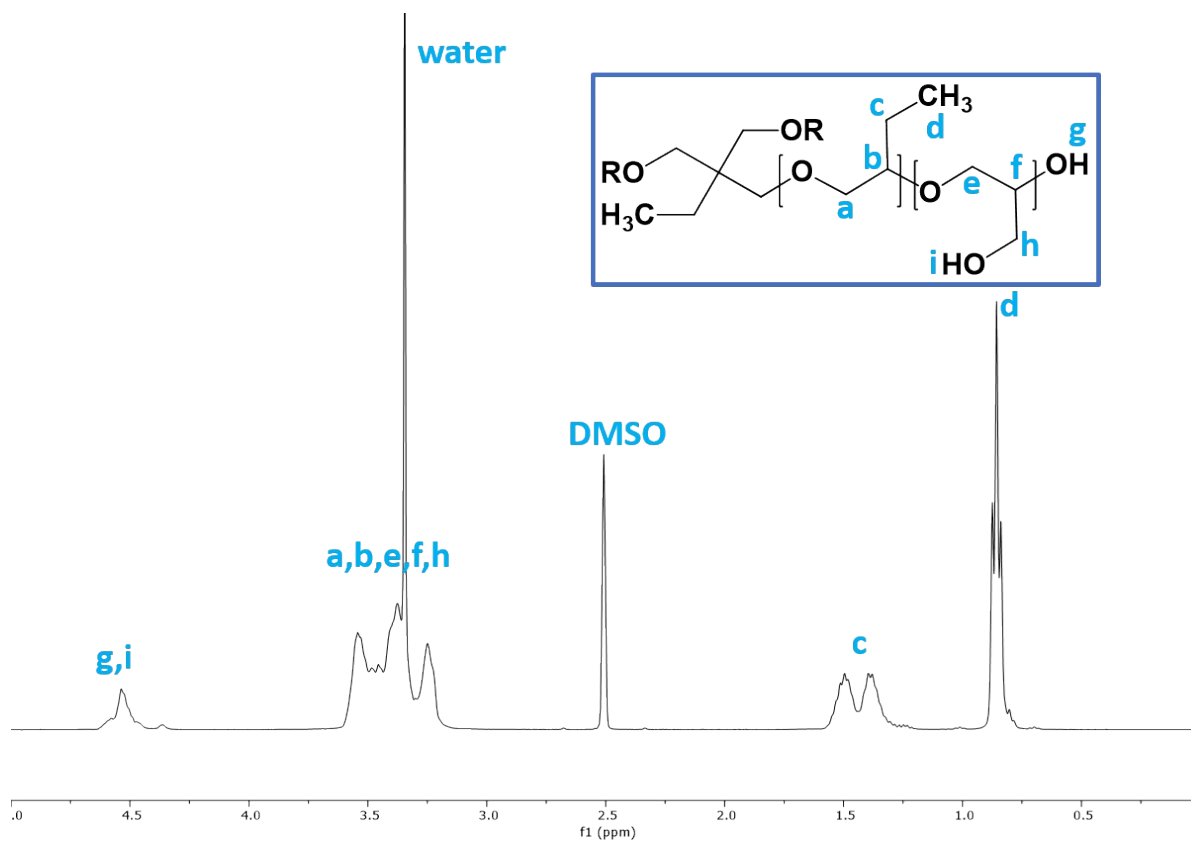

**S Figure 3.** <sup>1</sup>H NMR spectrum of poly(1,2-epoxybutane (3x10)-b-glycidol (3x4)) recorded in DMSO-d<sub>6</sub>.

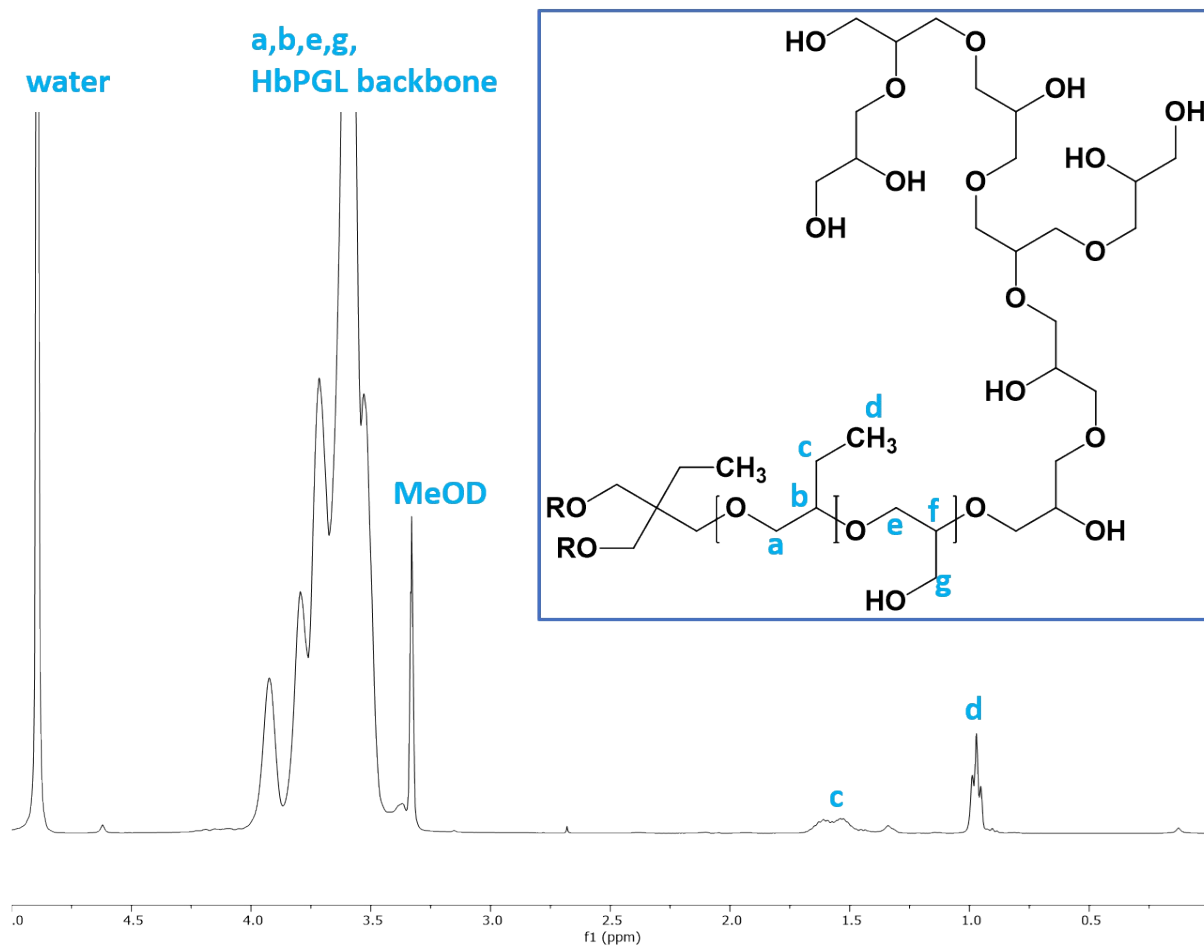

**S Figure 4.**  $^1\text{H}$  NMR spectrum of poly(1,2-epoxybutane (3x10))-b-hyperbranched polyglycidol (A86) recorded in  $\text{DMSO-d}_6$ .

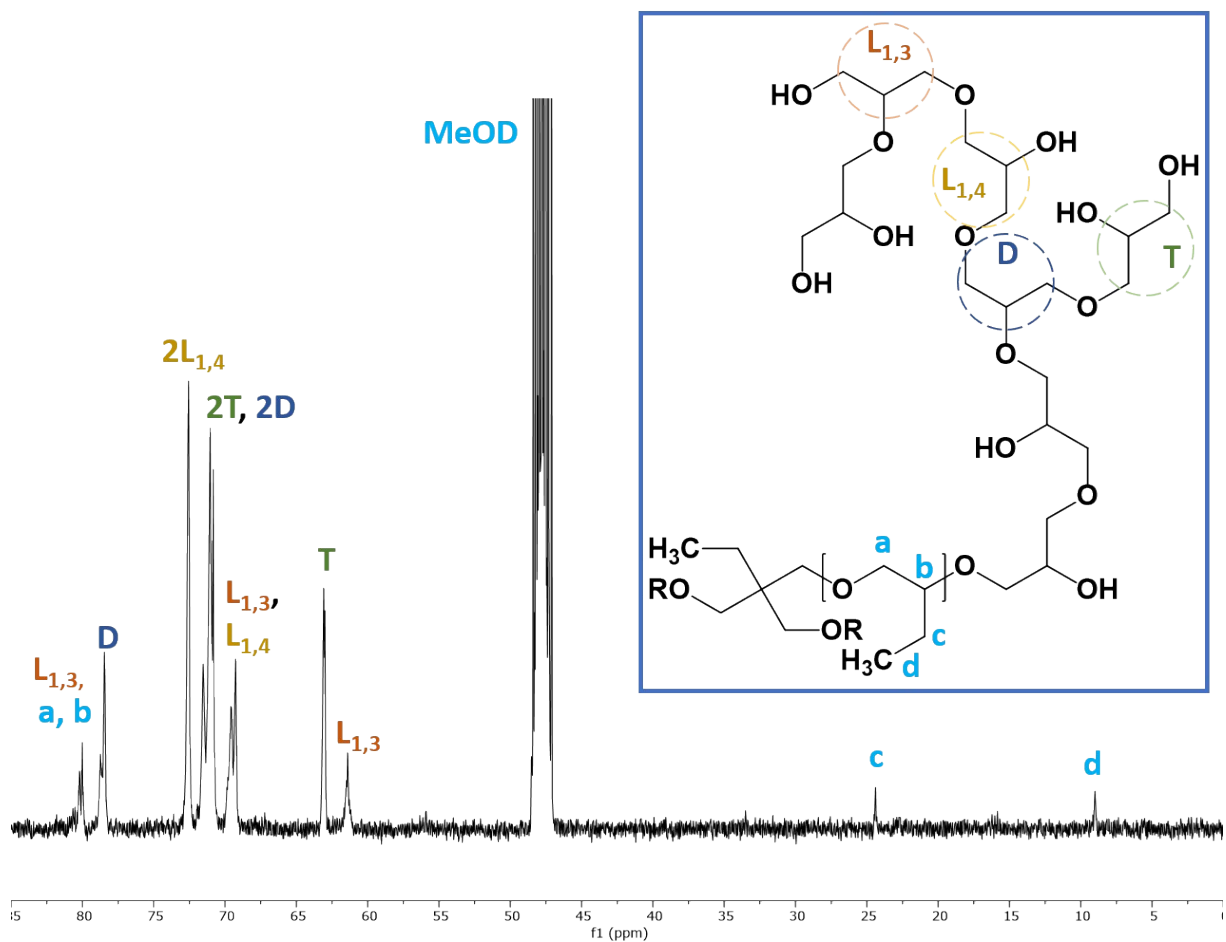

**S Figure 5.**  $^{13}\text{C}$  INVGATE NMR spectrum of poly(1,2-epoxybutane (3x10))-b-hyperbranched polyglycidol (A86) recorded in MeOD.

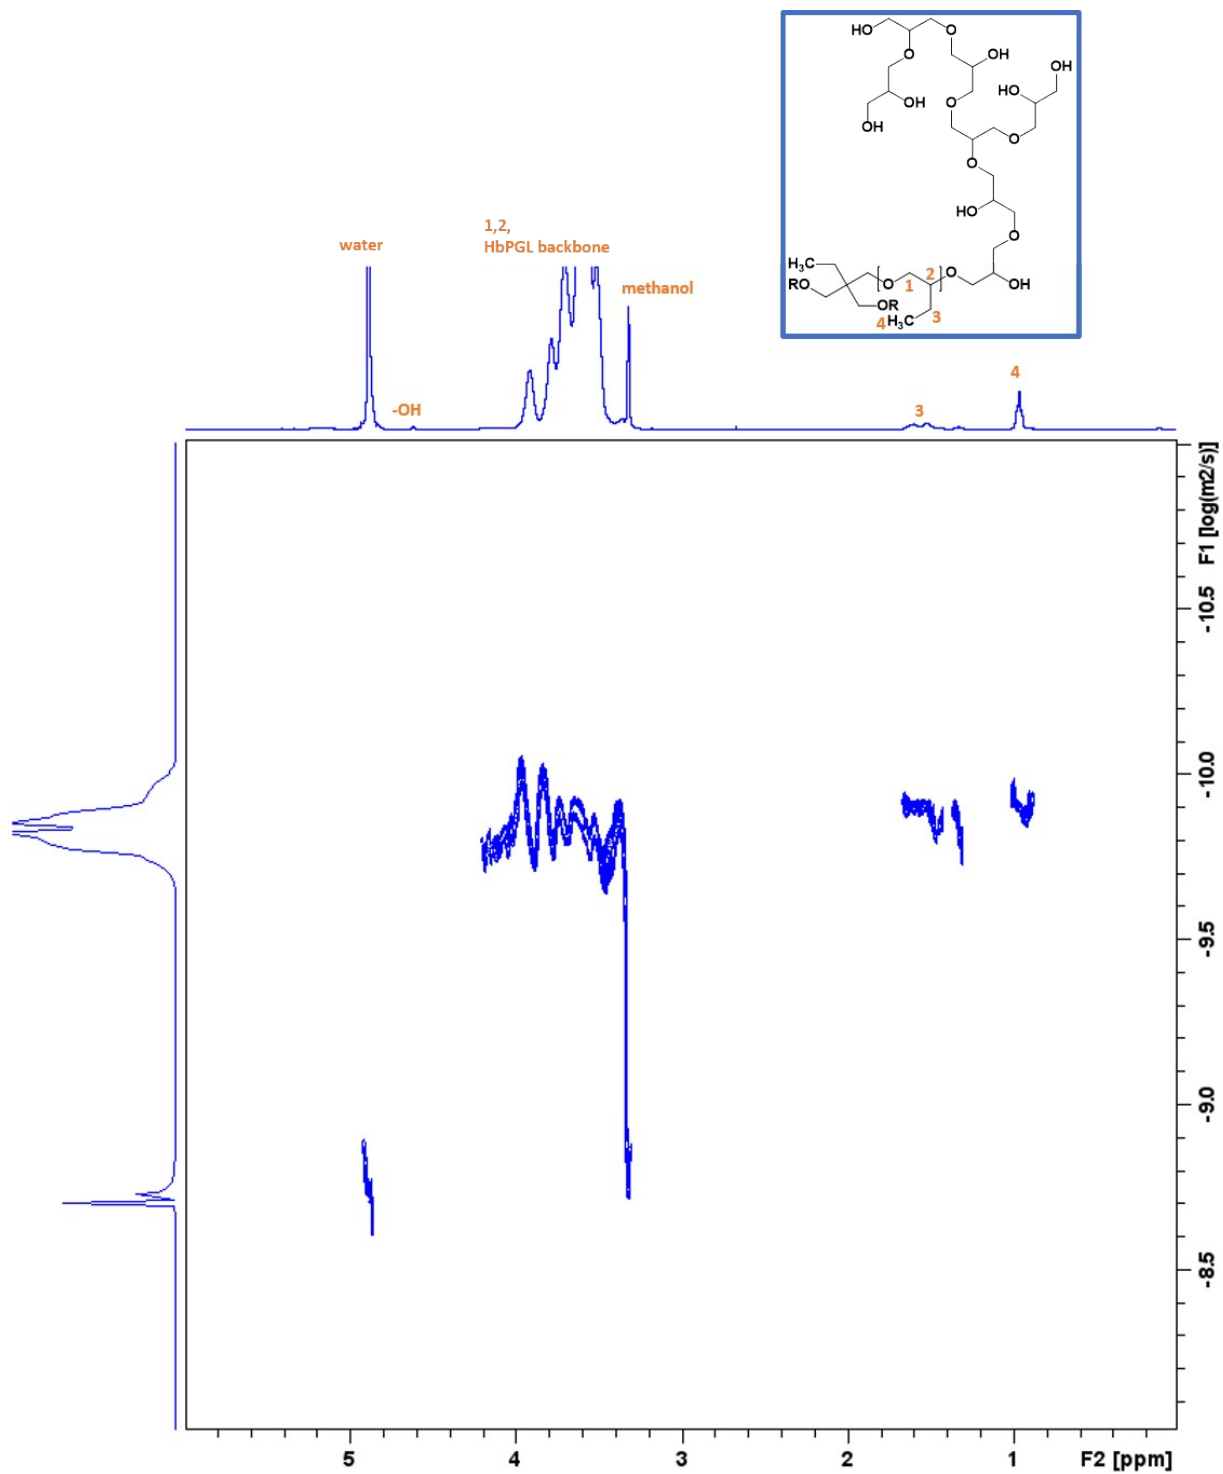

**S Figure 6.**  $^1H$  DOSY NMR spectrum of poly(1,2-epoxybutane (3x10))-b-hyperbranched polyglycidol (A86) recorded in MeOD.

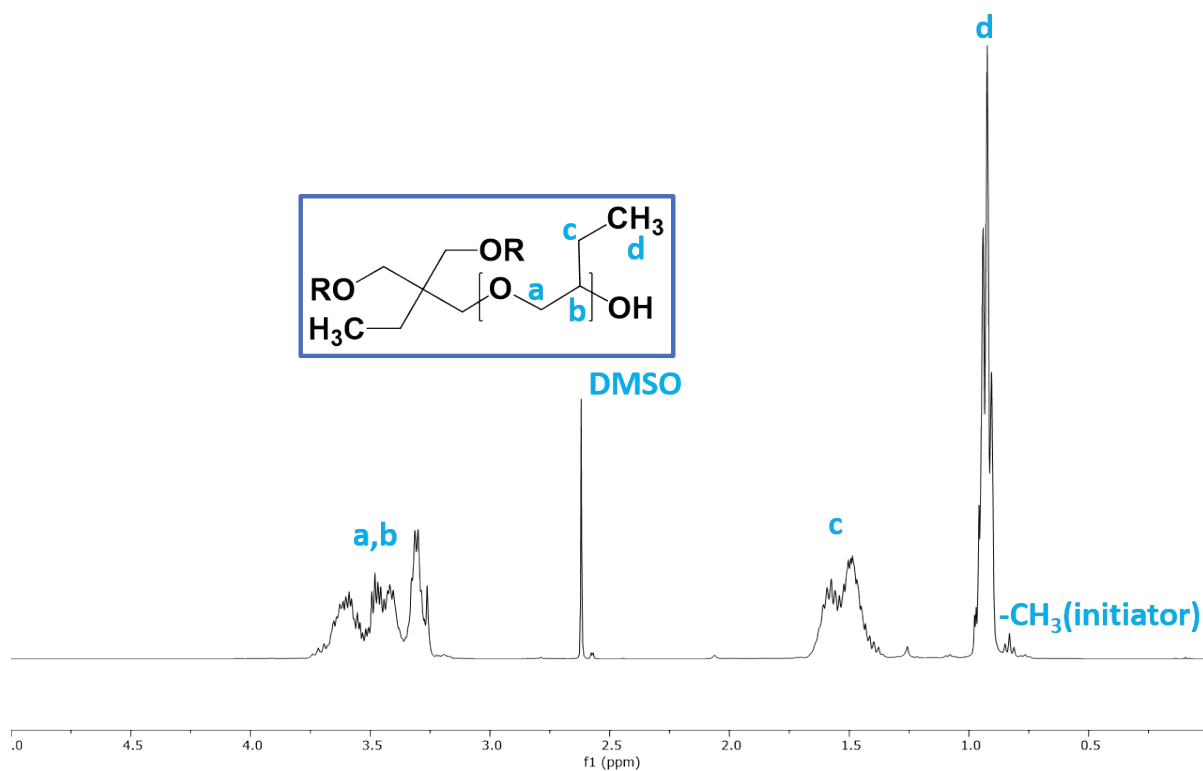

**S Figure 7.**  $^1\text{H}$  NMR spectrum of poly(1,2-epoxybutane (3x15)) recorded in  $\text{CDCl}_3$ .

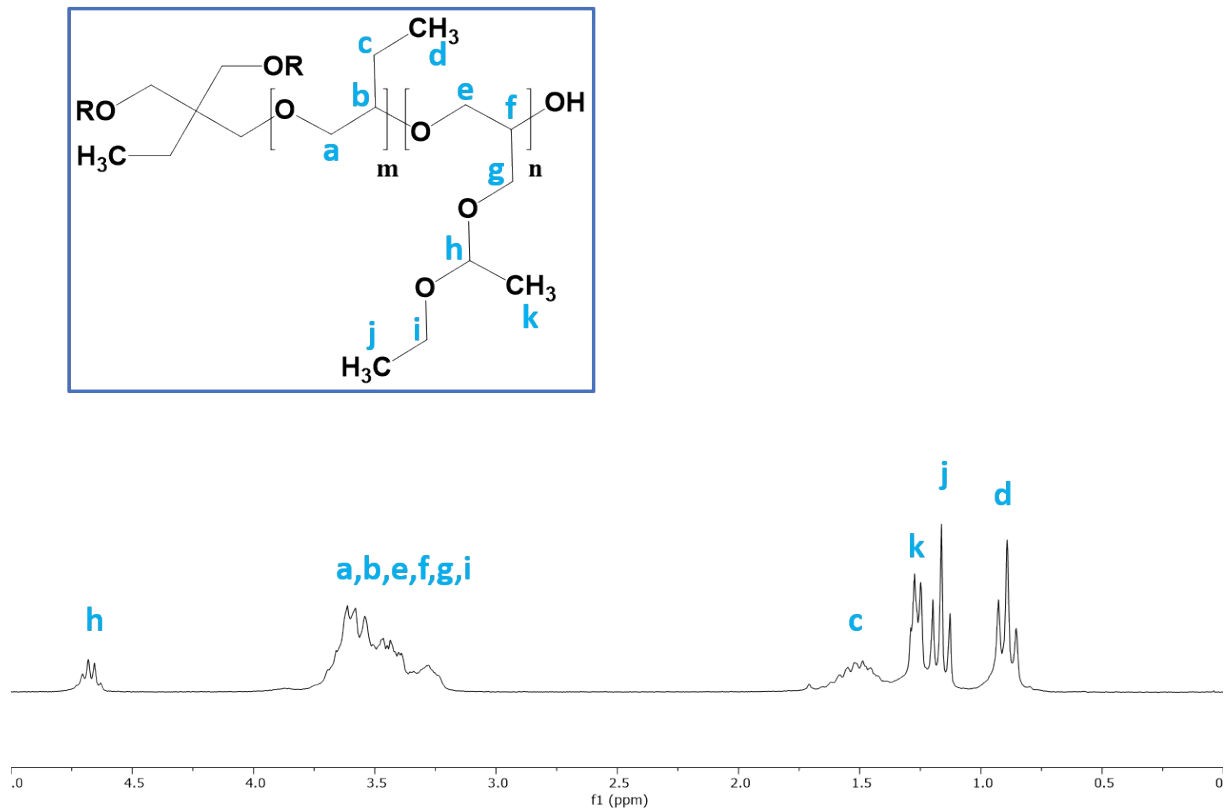

**S Figure 8.**  $^1\text{H}$  NMR spectrum of poly(1,2-epoxybutane (3x15))-b-ethoxyethyl glycidyl ether (3x14) recorded in  $\text{CDCl}_3$ .

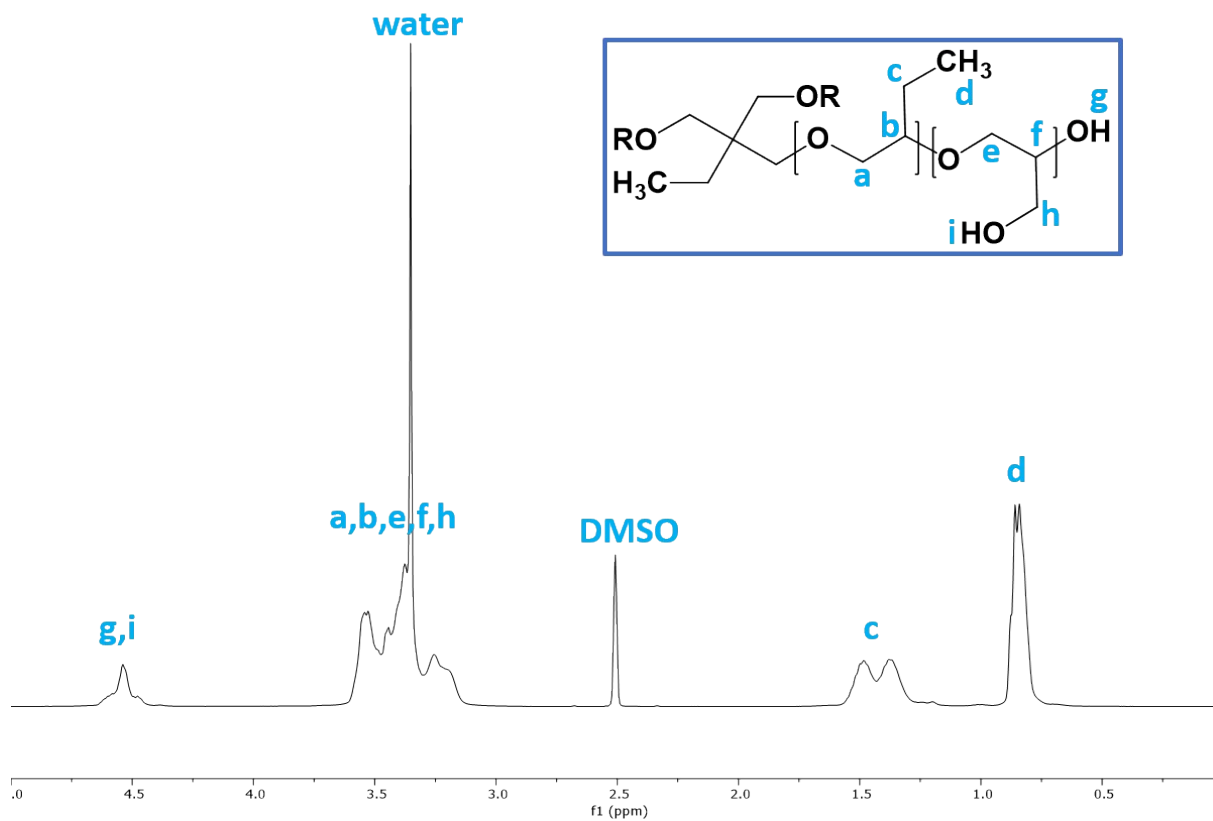

**S Figure 9.**  $^1\text{H}$  NMR spectrum of poly(1,2-epoxybutane (3x15)-b-glycidol (3x14)) recorded in  $\text{DMSO-d}_6$ .

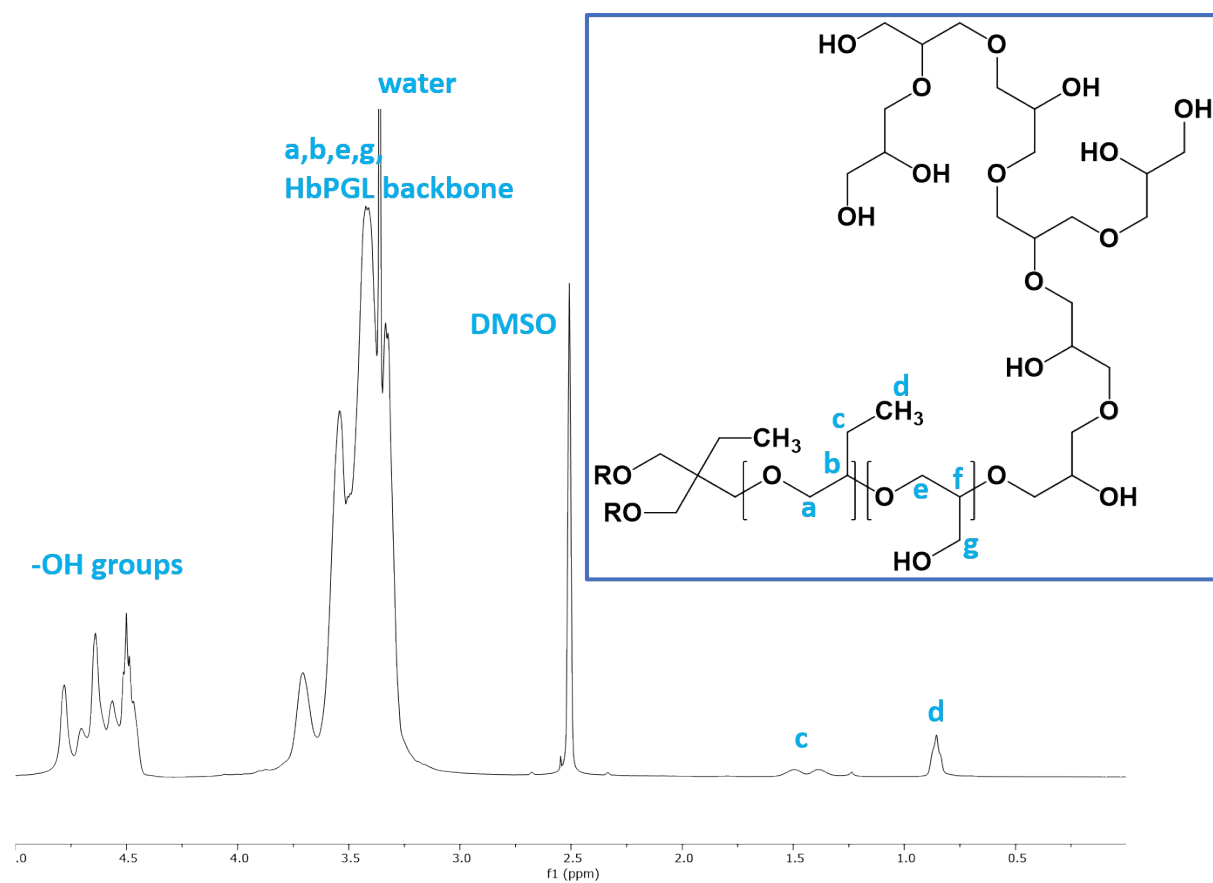

**S Figure 10.**  $^1\text{H}$  NMR spectrum of poly(1,2-epoxybutane (3x15))-b-hyperbranched polyglycidol (A92) recorded in  $\text{DMSO-d}_6$ .

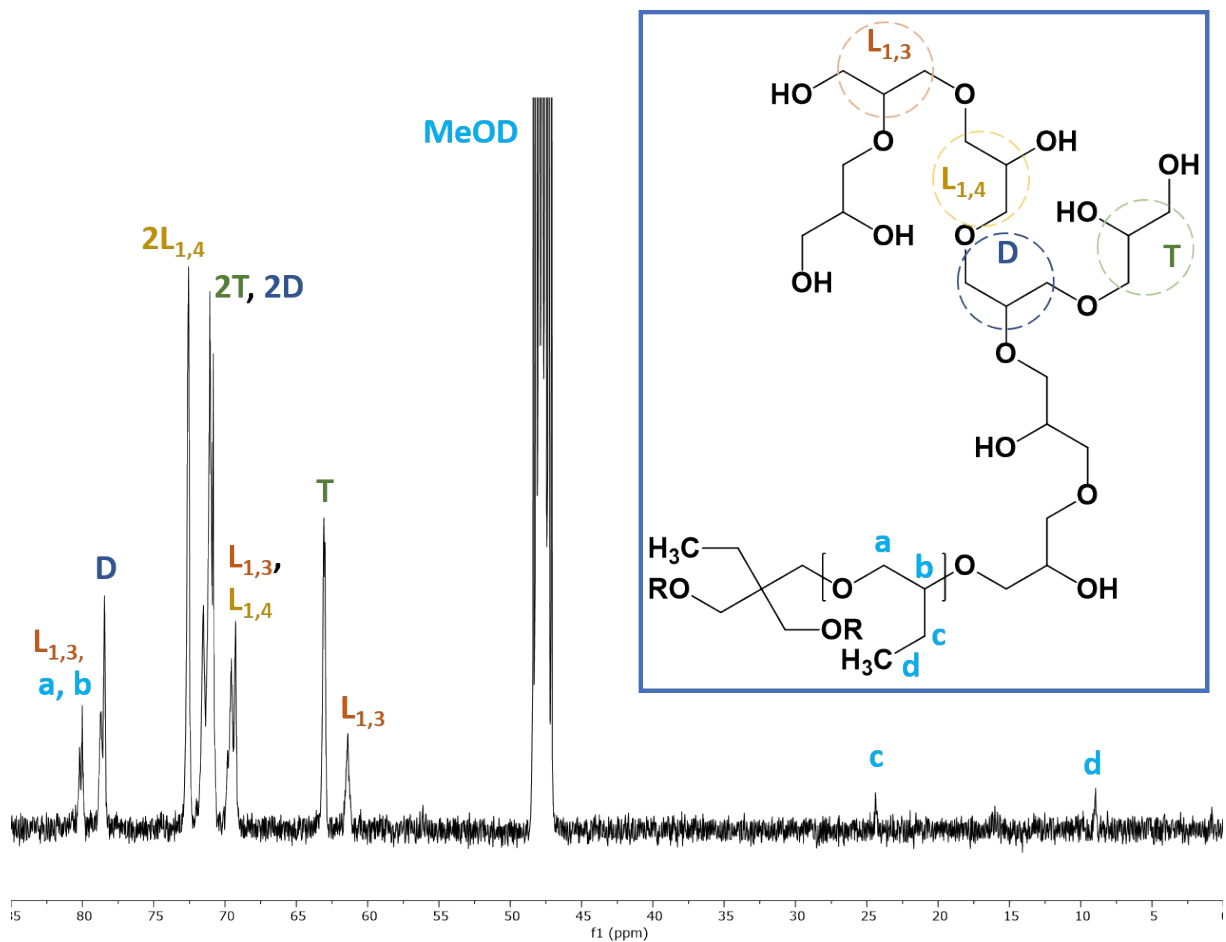

**S Figure 11.**  $^{13}\text{C}$  INVGATE NMR spectrum of poly(1,2-epoxybutane (3x15))-b-hyperbranched polyglycidol (A92) recorded in MeOD.



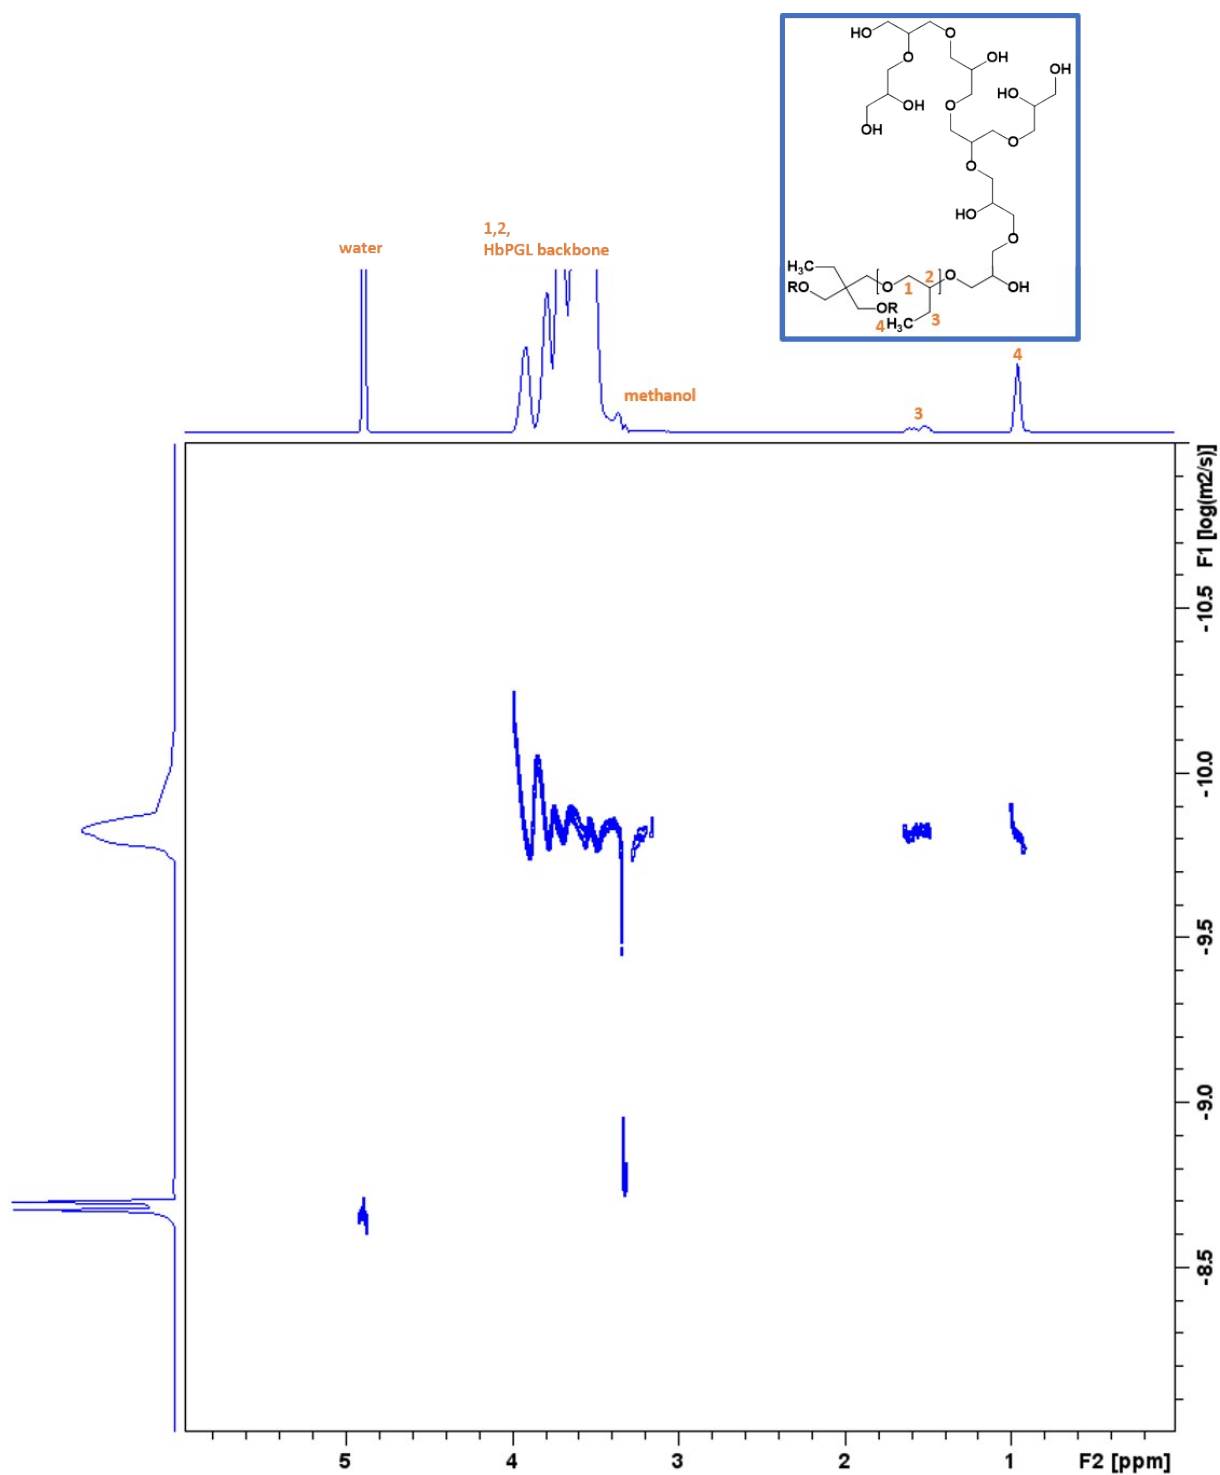

**S Figure 12.**  $^1H$  DOSY NMR spectrum of poly(1,2-epoxybutane (3x15))-b-hyperbranched polyglycidol (A92) recorded in MeOD.

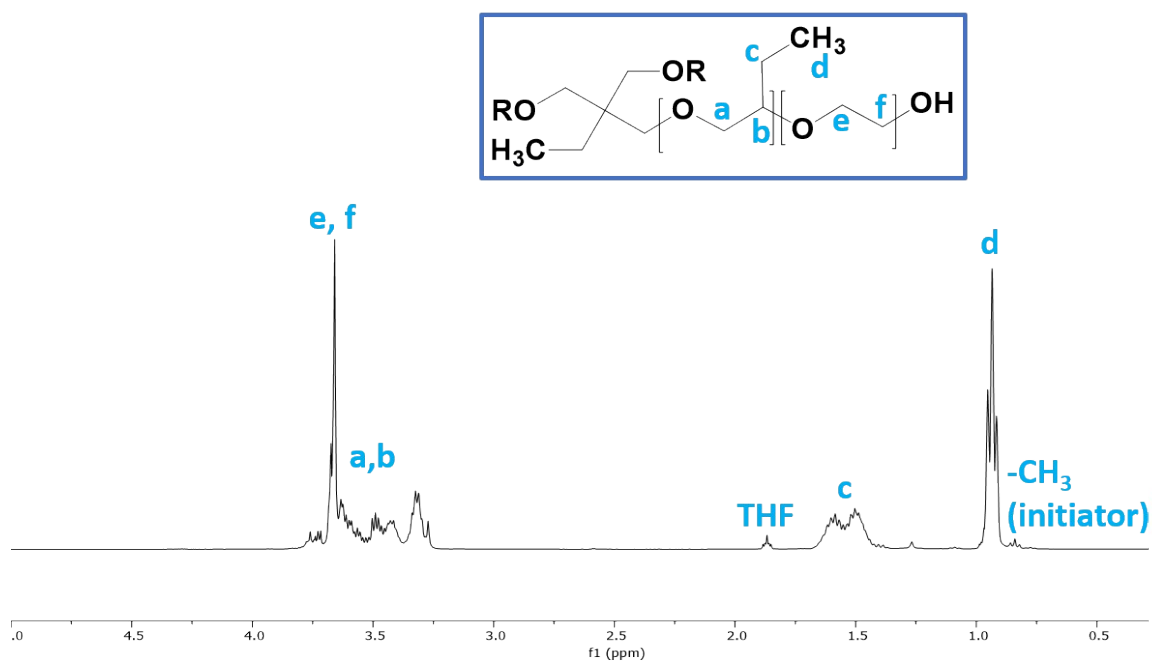

**S Figure 13.** <sup>1</sup>H NMR spectrum of poly(1,2-epoxybutane (3x15)-b-ethylene oxide (3x8)) recorded in CDCl<sub>3</sub>.

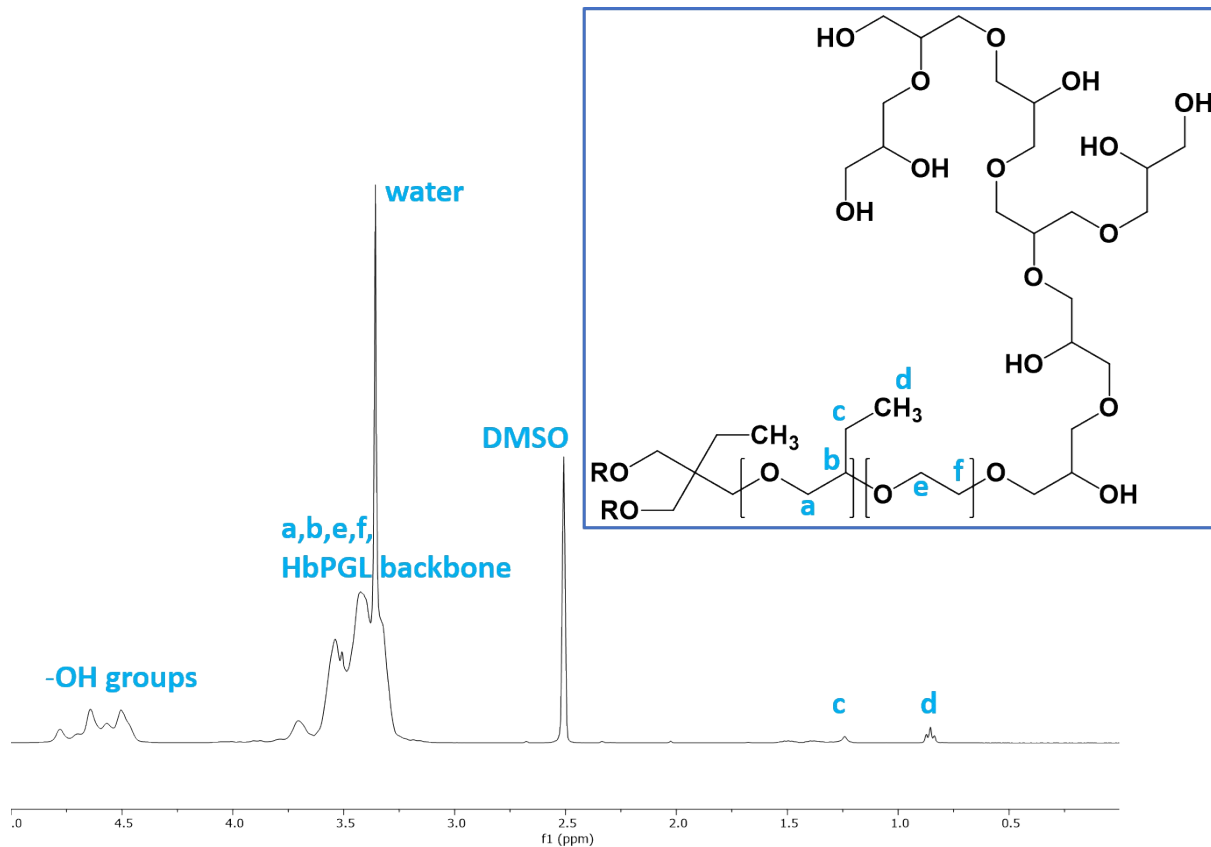

**S Figure 14.** <sup>1</sup>H NMR spectrum of poly(1,2-epoxybutane (3x15)-b-ethylene oxide (3x8))-b-hyperbranched polyglycidol (A165) recorded in DMSO-d<sub>6</sub>.

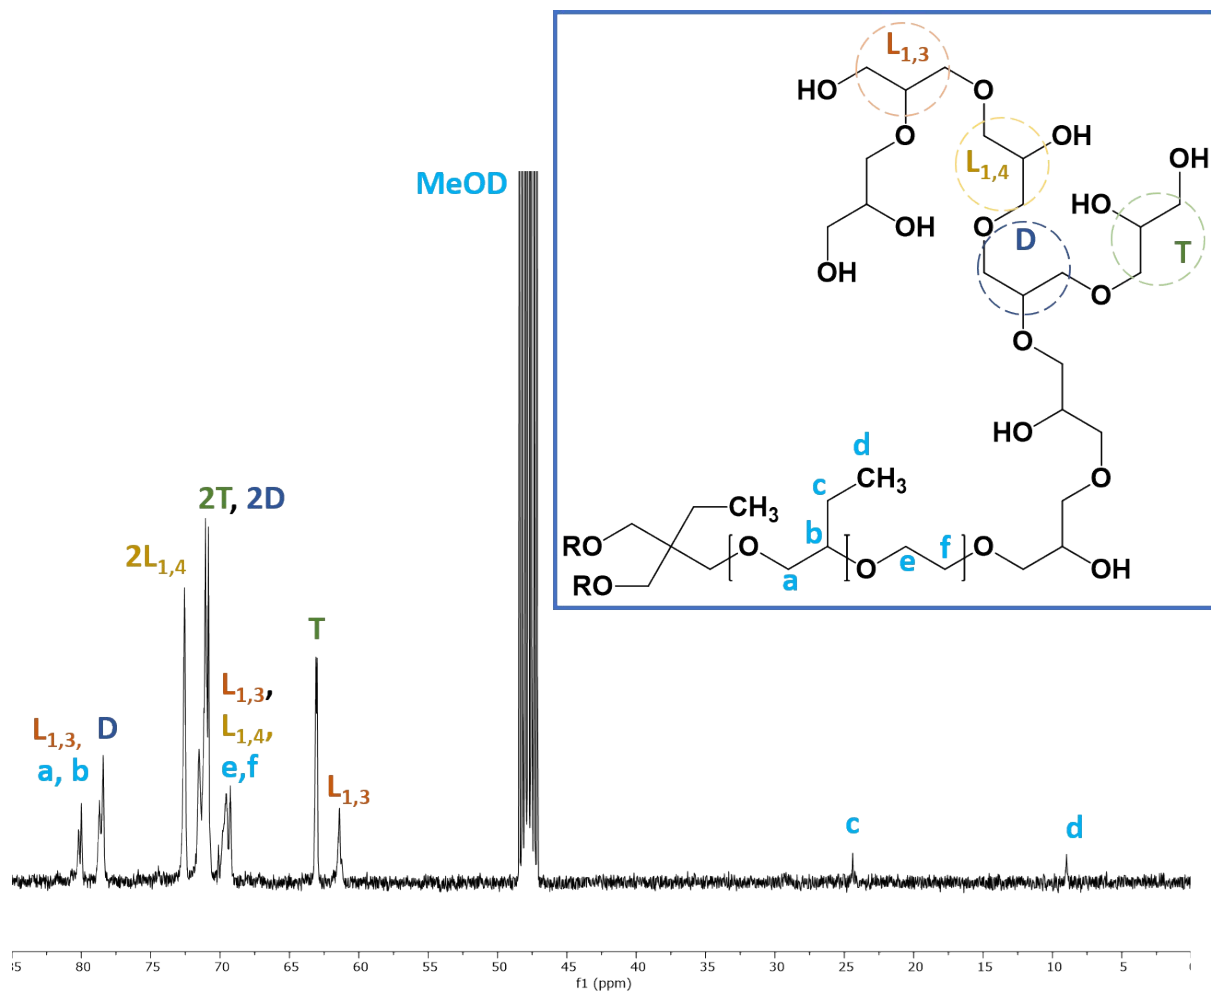

**S Figure 15.**  $^{13}\text{C}$  INVGATE NMR spectrum poly(1,2-epoxybutane (3x15)-b-ethylene oxide (3x8))-b-hyperbranched polyglycidol (A165) recorded in MeOD.

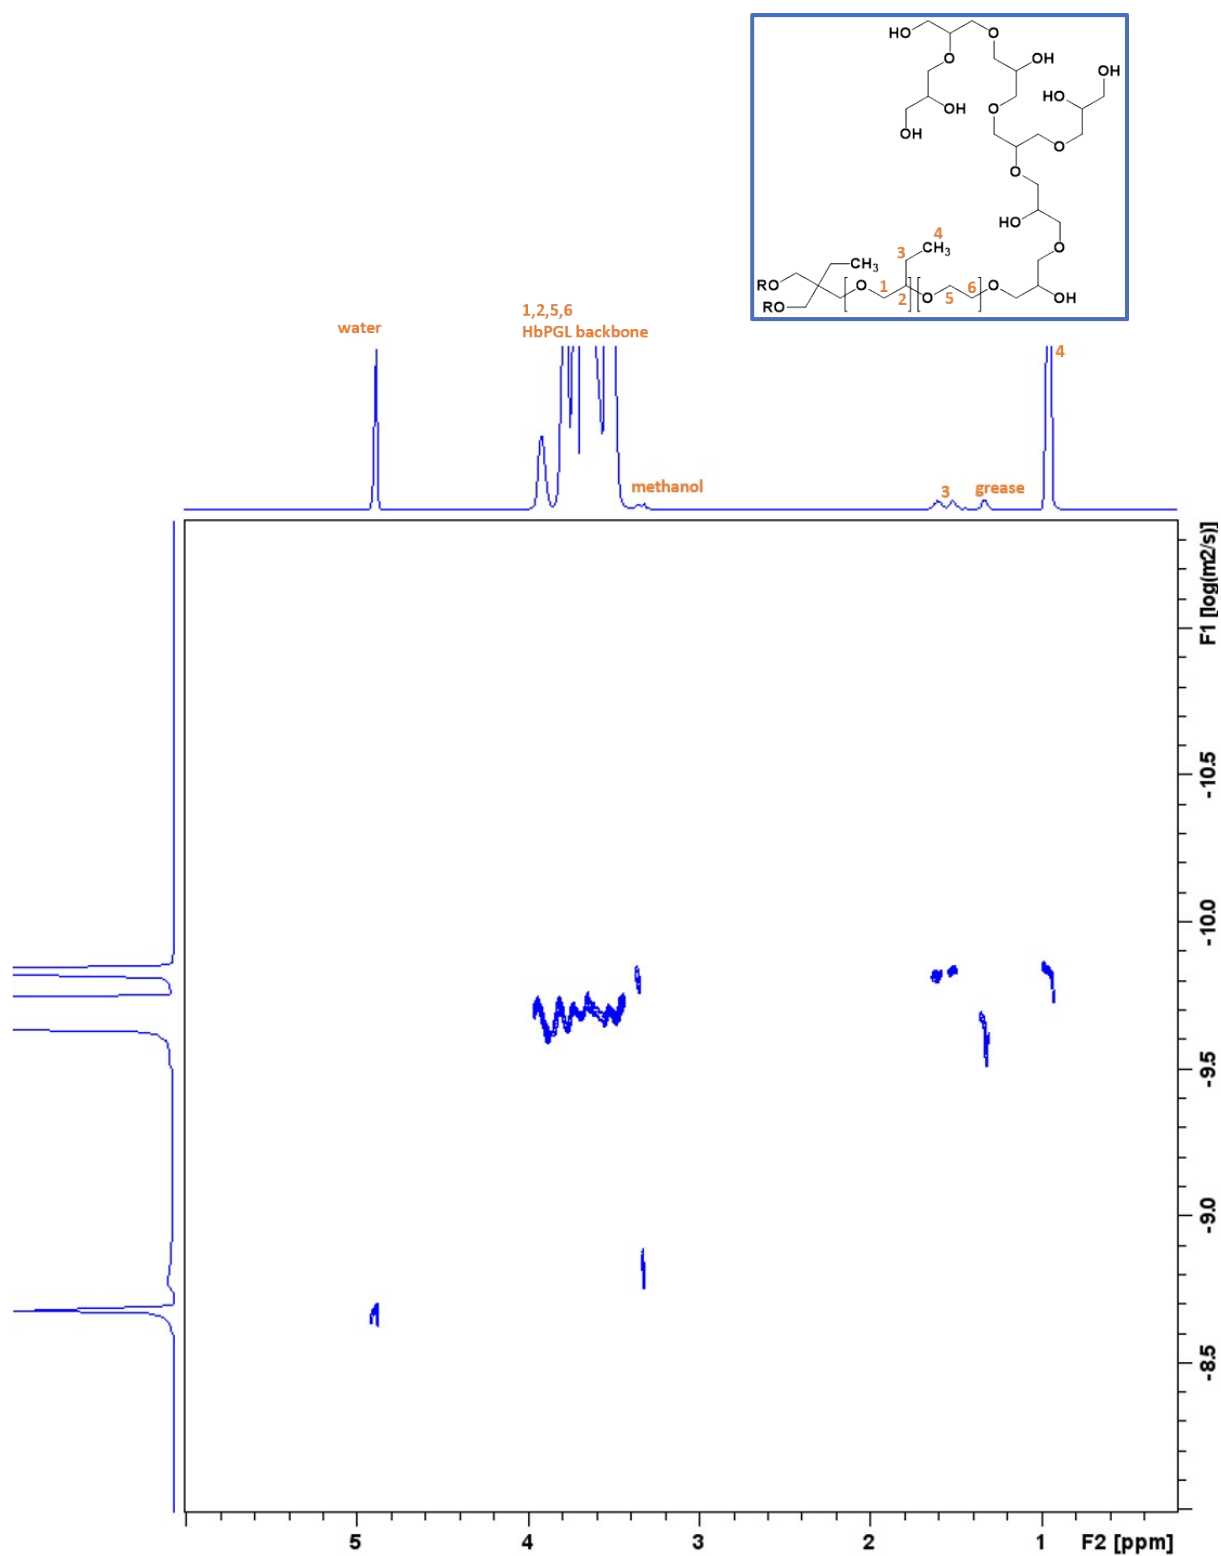

**S Figure 16.** <sup>1</sup>H DOSY NMR spectrum of poly(1,2-epoxybutane (3x15)-b-ethylene oxide (3x8))-b-hyperbranched polyglycidol (A165) recorded in MeOD.

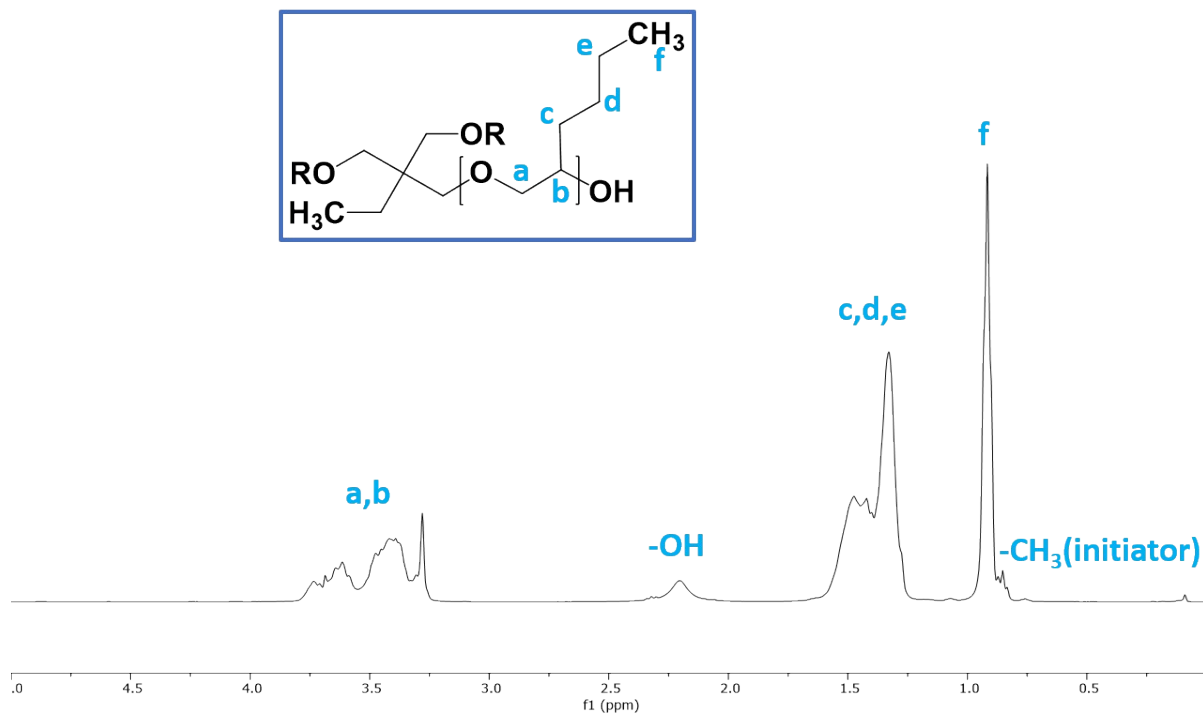

**S Figure 17.** <sup>1</sup>H NMR spectrum of poly(1,2-epoxyhexane (3x10)) recorded in CDCl<sub>3</sub>.

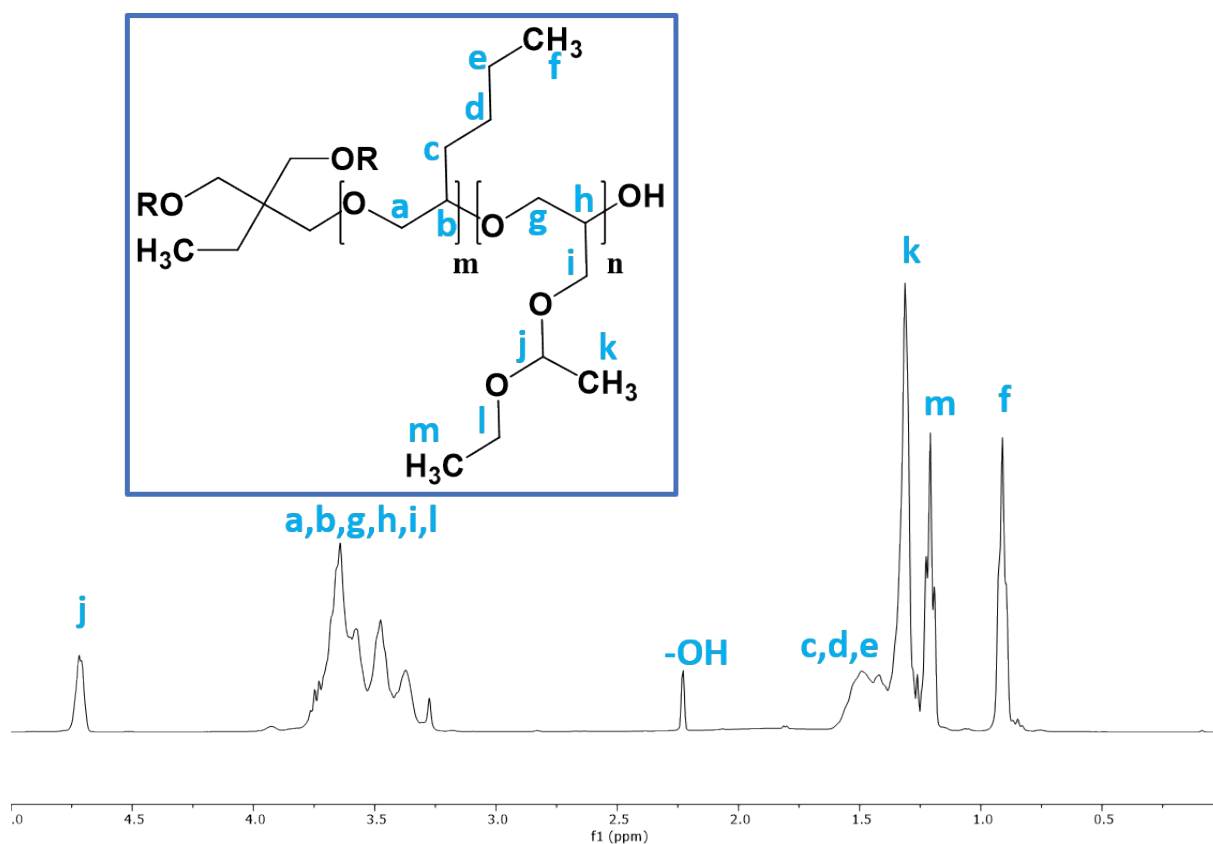

**S Figure 18.** <sup>1</sup>H NMR spectrum of poly(1,2-epoxyhexane (3x10))-b-ethoxyethyl glycidyl ether (3x10) recorded in CDCl<sub>3</sub>.

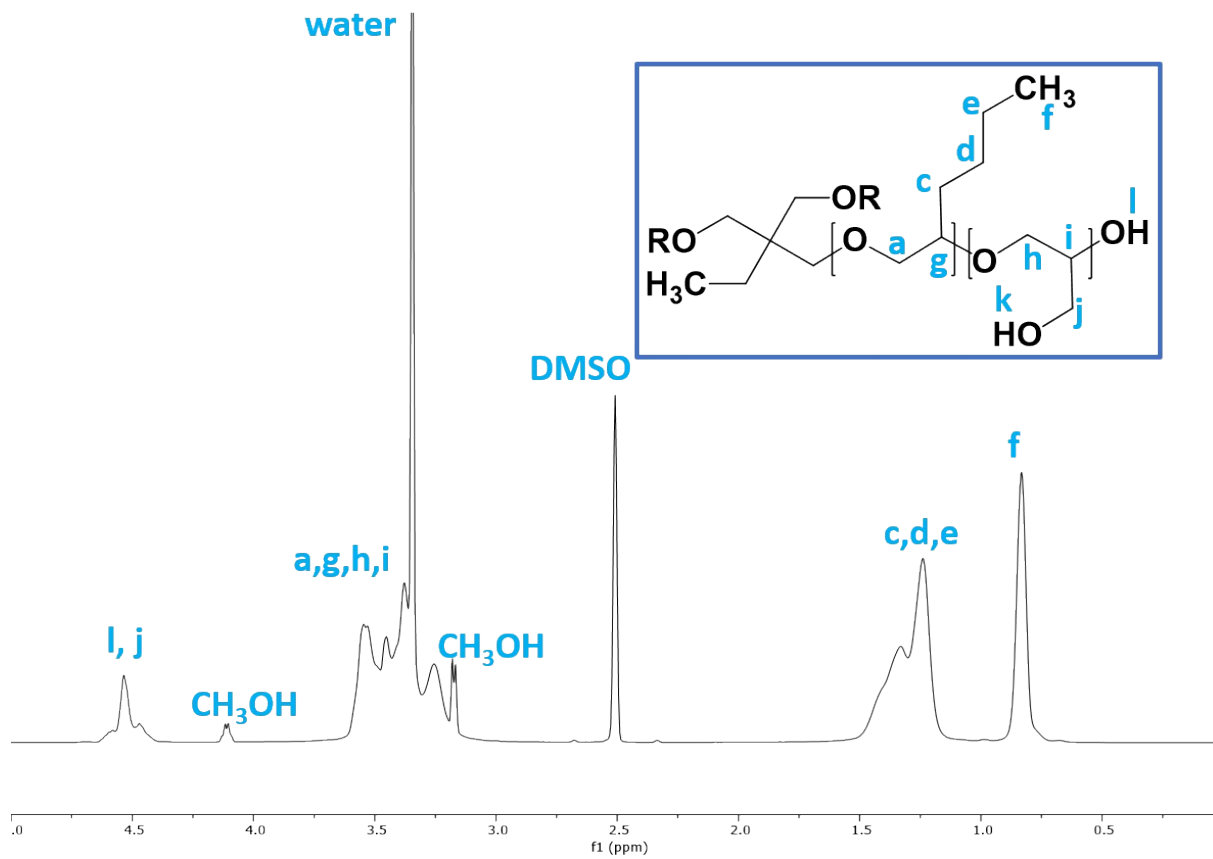

**S Figure 19.**  $^1\text{H}$  NMR spectrum of poly(1,2-epoxyhexane (3x10)-b-glycidol (3x10)) recorded in  $\text{DMSO-d}_6$ .

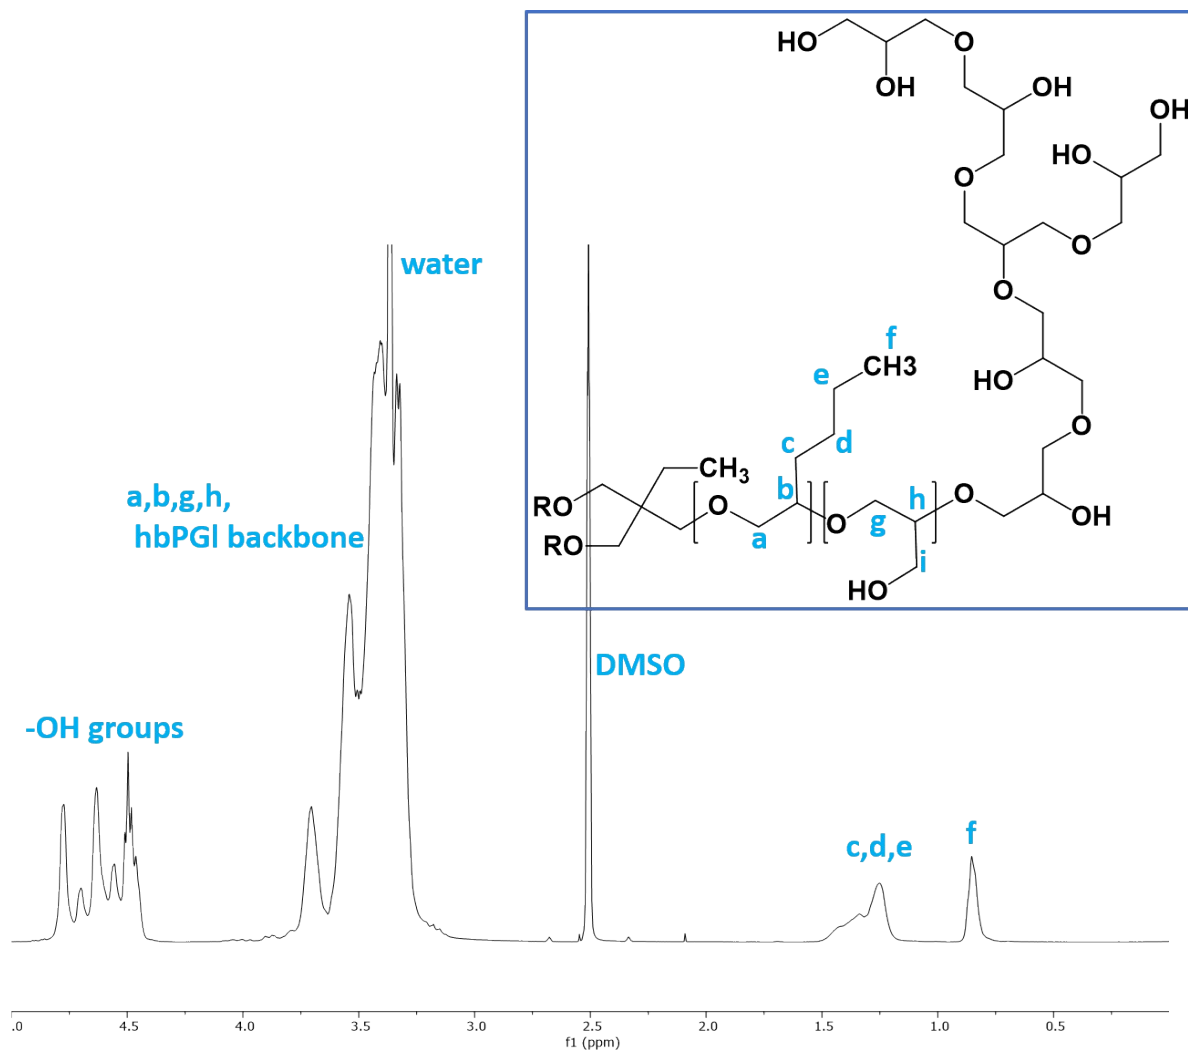

**S Figure 20.** <sup>1</sup>H NMR spectrum of poly(1,2-epoxyhexane (3x10))-b-hyperbranched polyglycidol (A71) recorded in DMSO-d<sub>6</sub>.

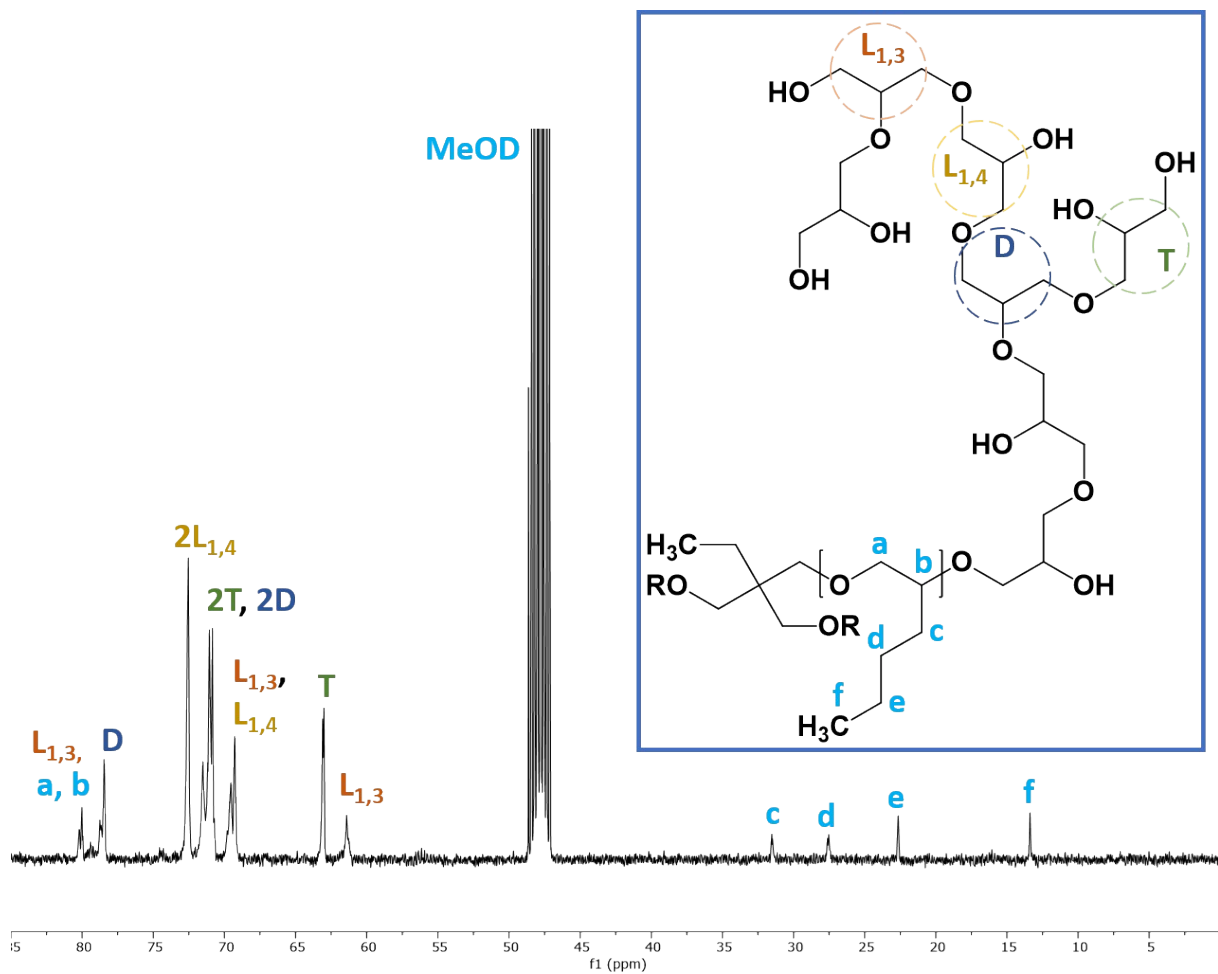

**S Figure 21.**  $^{13}\text{C}$  INVGATE NMR spectrum of poly(1,2-epoxyhexane (3x10))-b-hyperbranched polyglycidol (A71) recorded in MeOD.



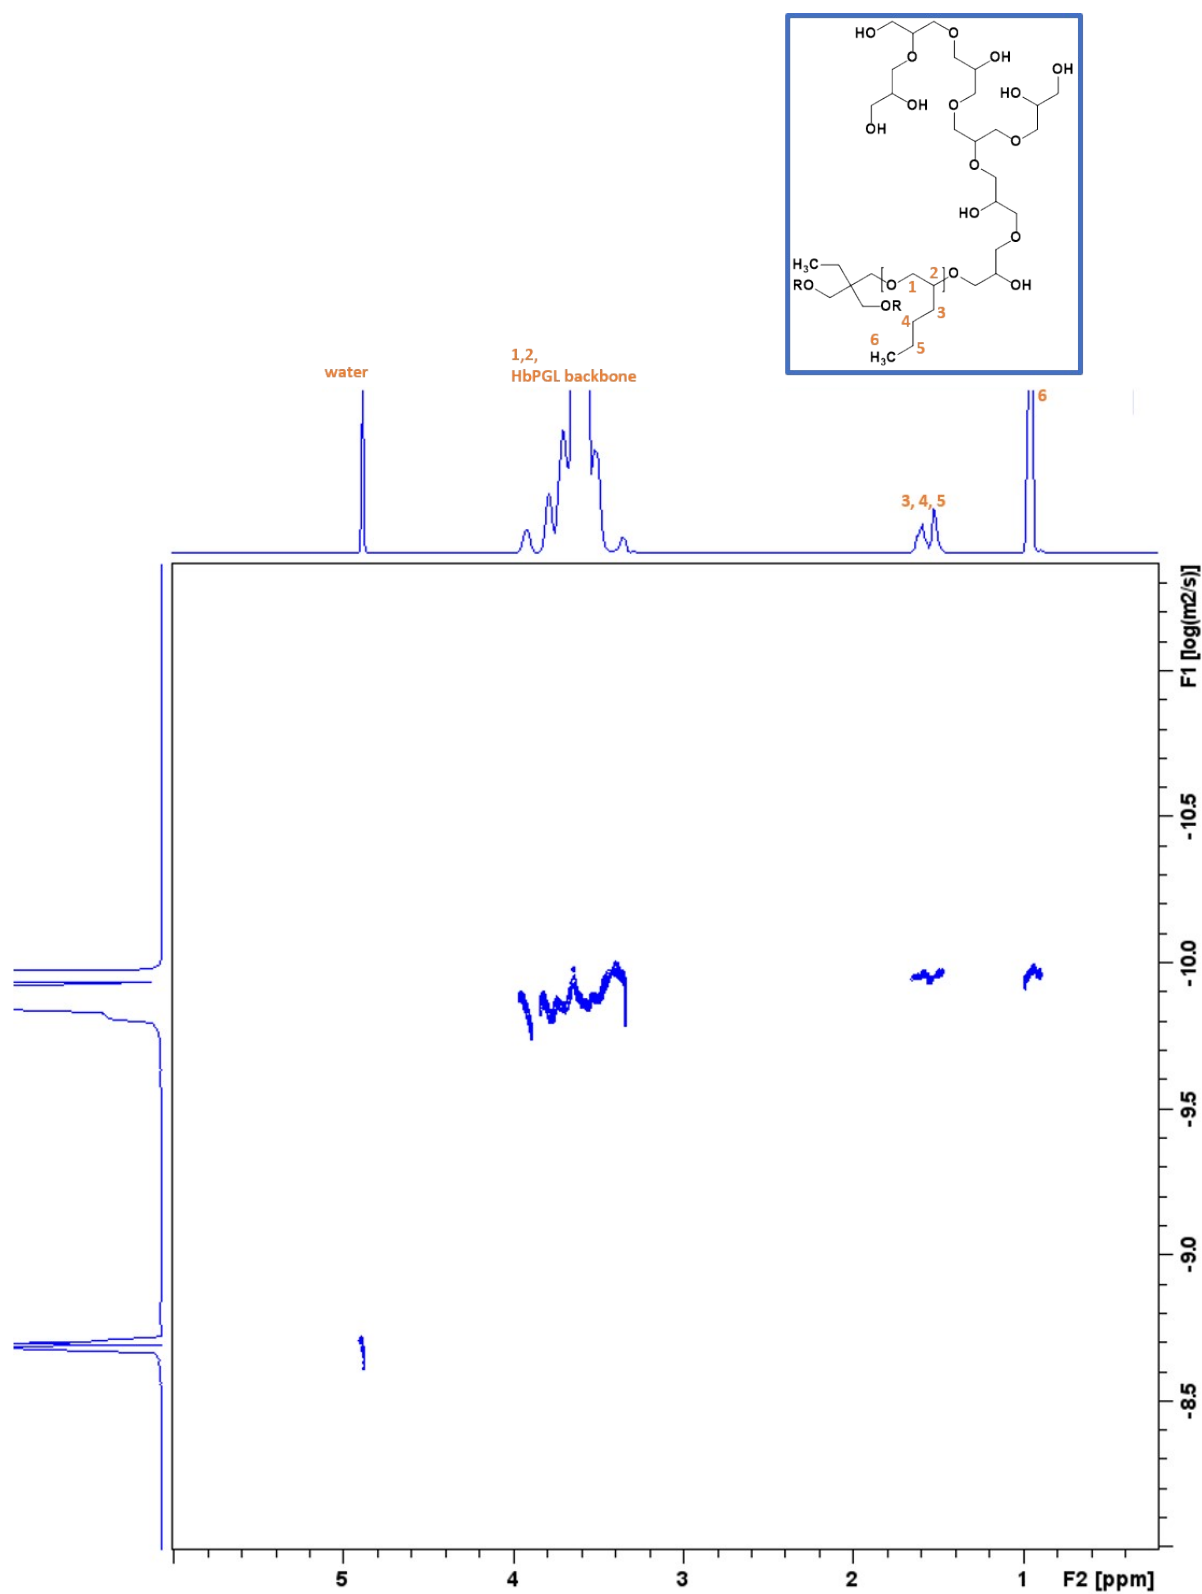

**S Figure 22.** <sup>1</sup>H DOSY NMR spectrum of poly(1,2-epoxyhexane (3x10))-b-hyperbranched polyglycidol (A71) recorded in MeOD.

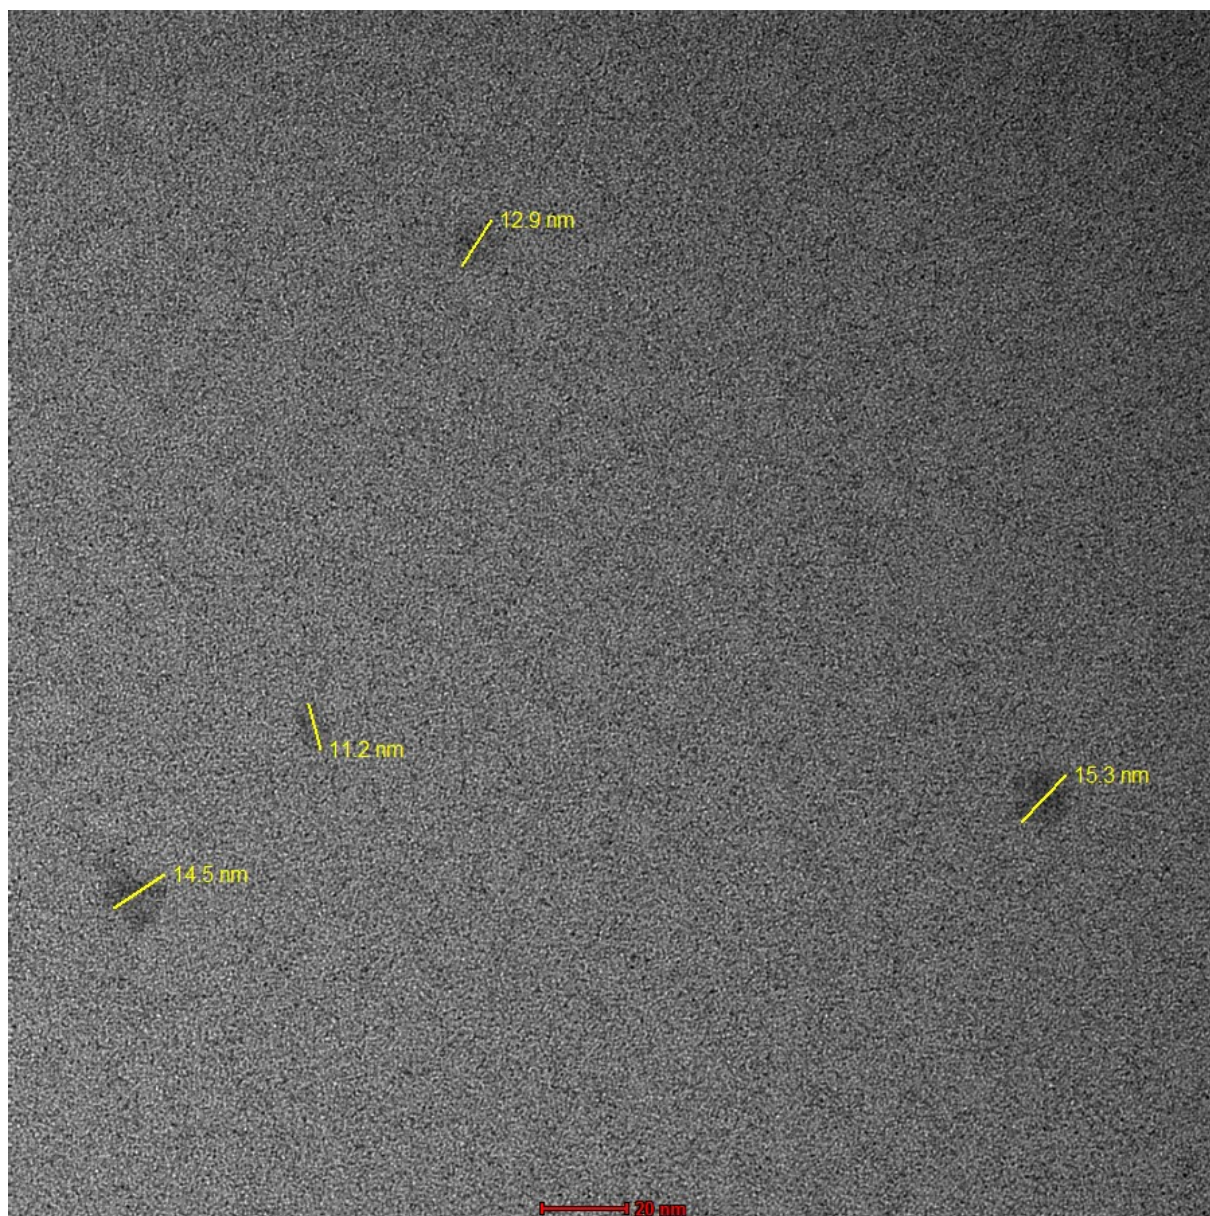

**S Figure 23.** TEM image demonstrating the shape and diameter of unimolecular micelles based on A71.

Transmission Electron Microscopy, TEM TEM image was taken with Talos FX, FEI (Thermo Fisher Scientific, Waltham, MA USA). For TEM analysis, the aqueous solution of copolymer saturated with nifuratel was deposited on carbon-coated copper grid and evaporated. Image analysis was performed with Sigma Scan 5.0.

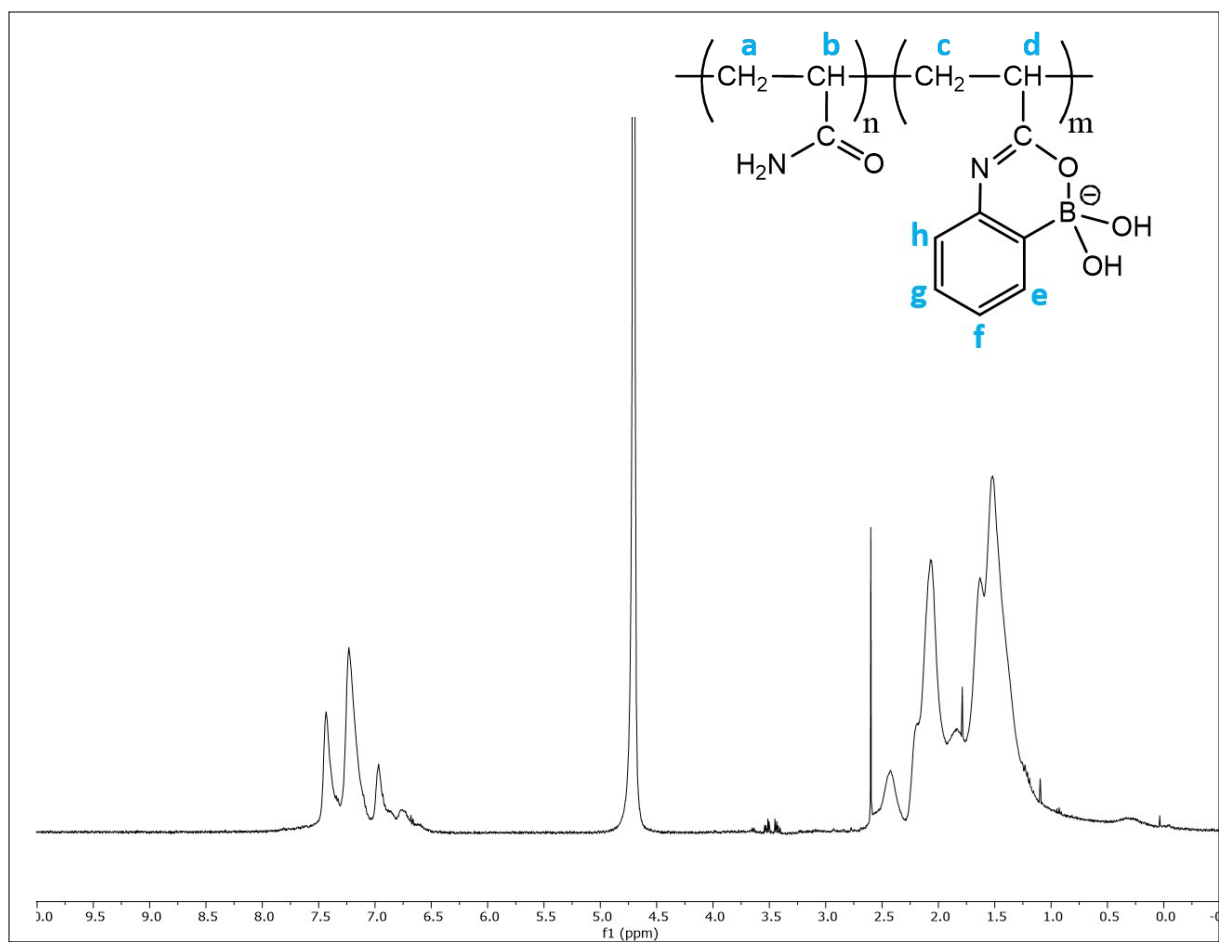

**S Figure 24.**  $^1\text{H}$  NMR spectrum of poly(acrylamide-*ran*-2-acrylamidephenylboronic acid), 80:20 recorded in  $\text{D}_2\text{O}$ .

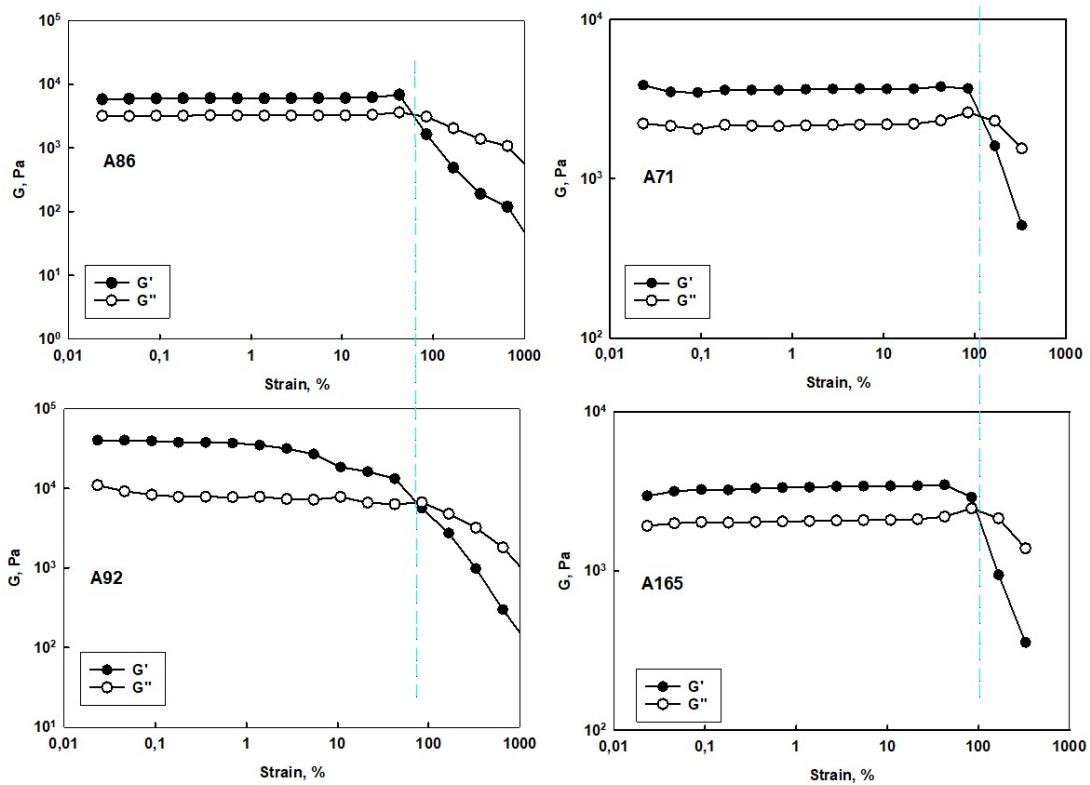

**S Figure 25.** Strain sweep tests performed for hydrogel systems constructed of polyether-based star-hyperbranched unimolecular micelles.
